# Supplementary material for: Co-evolving N-Fe redox processes controlled iron minerals in banded iron formation
Source: Research Square preprint supplement (doi:10.21203/rs.3.rs-3724120/v1), 2024-01-08
Supplement: Supplementary file 1 [file d242b36cee08be14b900149b.docx]

**Co-evolving N-Fe redox processes controlled iron minerals in banded iron formation**

Liuqin Huang1#, Yanlong Dong2#, Linxin Li1, Nicole X. Nie4, Geng Wu1, Jian Yang1, Li Ma1, 3, Hailiang Dong5,6*, Hongchen Jiang1,6*

1 State Key Laboratory of Biogeology and Environmental Geology, China University of Geosciences, Wuhan, 430074, China

2 Badong National Observation and Research Station of Geohazards, China University of Geosciences, Wuhan, 430074, China

3 School of Ocean Science, China University of Geosciences, Beijing 100083, China

4 Department of Earth, Atmospheric, and Planetary Sciences, Massachusetts Institute of Technology, Cambridge, MA 02139, USA

5 Center for Geomicrobiology and Biogeochemistry Research, State Key Laboratory of Biogeology and Environmental Geology, China University of Geosciences, Beijing, 100083, China

6 Frontiers Science Center for Deep-time Digital Earth, China University of Geosciences (Beijing), Beijing 100083, China

#equal contribution

*Corresponding author:

Hongchen Jiang, Jiangh[@cug.edu.cn](mailto:xxxxx@xxxx.xxx);

Hailiang Dong, [dongh@cugb.edu.cn](mailto:dongh@cugb.edu.cn);

**Supplemental materials and methods**

**1. Hot springs and sample collection**

Yunnan-Xizang geothermal zone is located in the center of the Mediterranean-Himalayas geothermal belt1 (Fig. S1a). The collision between the India and Eurasian plates since the Cenozoic resulted in the uplift of the Qingzang Plateau 2. Briefly, over the course of time from the Cretaceous to the Eocene, the Indian plate moved northward and collided with the Eurasian plate. Since the Eocene, especially since the Quaternary, the Qingzang Plateau has been strongly uplifted due to collision. Subsequently, the subduction of Indian continental lithosphere under the Eurasian plate led to the shortening and thickening of the crust, forming the modern Qingzang Plateau 4. This large-scale regional tectonic activity and rapid exhumation of the deep crustal rocks have induced a series of approximately N–S stretching faults in the crust3 (Fig. S1a), providing strong hydrothermal activities for the development of hot springs in the region.

Numerous hot springs with a wide range of physicochemical conditions (i.e., pH ranging from <1.8 to >9.3, temperature from ambient to near boiling) have developed in the Xizang-Yunnan geothermal area5. Hot springs in Tengchong (Rehai, Ruidian and Houqiao) were sampled in September 2019, August 2020, November 2021 and August 2022, while hot springs in Xizang (Dagejia, Quzhuomu and Qucai) were sampled in August 2020 (Fig. S1, Table S1 and S2). The hot springs in the Tengchong area are characteristic of high Si content and low organic carbon6. At each hot spring, the temperature and pH of spring water were measured by using portable meters (LaMotte, MD, USA). Contents of some geochemical ions such as S2-, SiO3-, NO2-, and Fe2+ in water were measured *in-situ* by using Hach kits (Hach Company, CO, USA). After field measurements, two filtrated water samples (through 0.22 μm filters, 10 mL each) were collected for cation analysis (acidified with concentrated HNO3), and additional two filtered water samples (no acidification) were collected for anion analysis. Water samples for dissolved inorganic carbon (DIC) analysis were collected into 40-mL glass vials, followed by addition of 100 μL saturated HgCl2 to kill microbial activity and capping the vials while ensuring that there were no bubbles in the headspace. Water samples for dissolved organic carbon (DOC) analysis were collected by filtrating spring water through glass membrane (0.45 μm, preheated at 450 oC for 5h), and the resulting filtrate was collected into 40-mL glass vials, followed by acidification with concentrated phosphoric acid. Spring water-sediment mixtures were aseptically collected into 50-mL sterilized centrifuge tubes and used as inoculum for enriching nitrifying, denitrifying and Fe(II)-oxidizing microorganisms. In addition, 5-L of spring water was collected as cultivation medium. The samples for cultivation were stored at 4 °C.


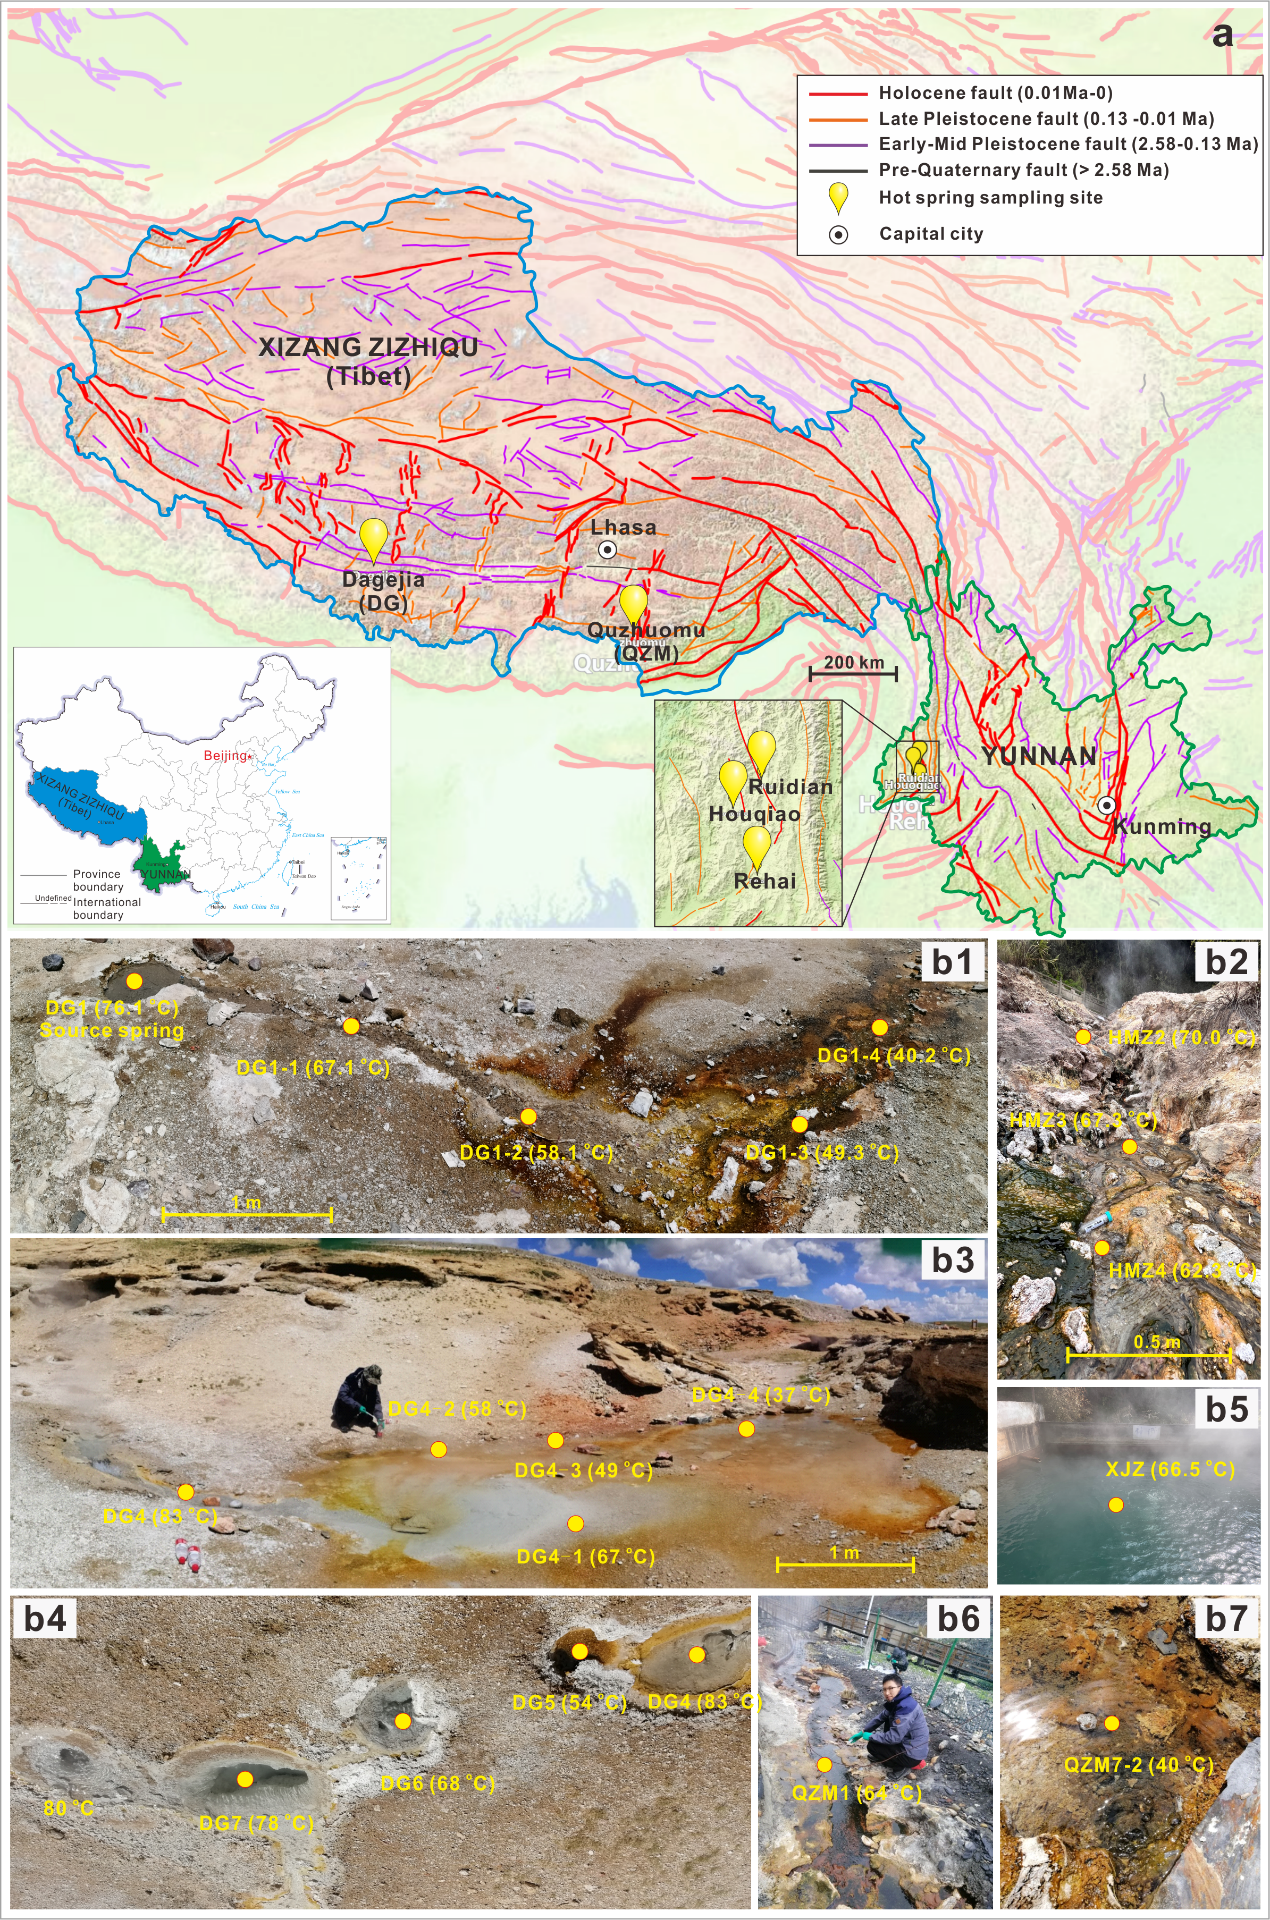
**Fig. S1** The sampled hot spring sites in the Xizang-Yunnan geothermal zone (**a**) and the photos of representative hot springs (**b**). Numerous large-scale faults developed in the crust of Qingzang Plateau due to the collision between Indian and Eurasian plates, providing large hydrothermal flux to hot springs. In (a), the yellow balloons denote the sampling sites located in Dagejia and Quzhuomu in southeastern Xizang, and in Ruidian, Rehai and Houqiao in western Yunnan Province. Representative hot spring flow channels (**b1, b2**), pool (**b3**) and puddles (**b4**) with temperature gradients were shown. Some individual hot springs (**b5-b7**) were also shown.

**2. N-Fe redox couple experimental design**

Detailed experimental design of N-Fe redox reactions, including enrichment of nitrification and denitrification consortia from hot springs, coupled Fe(II) oxidation and NOx- reduction, were described in the Methods of the main text and listed in Tables S3-S5.

**3. Wet chemistry analysis**

Fe(II) oxidation was monitored by measuring Fe(II) consumption using the Ferrozine method7. Culture samples were collected anaerobically at each time point: suspension samples were used to determine total Fe(Ⅱ) content, while dissolved Fe(II) was measured in the supernatant (without Fe minerals). After overnight reduction of Fe(III) to Fe(II) with 10% hydroxylamine, the suspension was measured for total Fe content. Briefly, homogeneous suspensions were collected anaerobically in an anaerobic chamber and digested in 1 M HCl for 24 h for total Fe(II) analysis, and the supernatant was used for dissolved Fe(II) measurement. NOx- reduction was monitored by measuring NO3- and NO2- in the supernatant with spectrophotometric methods8,9.

Concentrations of cations (NH4+, Li+, Na+, K+, Mg2+, Ca2+) and anions (F-, Cl-, NO2-, SO42-, Br-, NO3-, PO42-) in the sampled hot spring waters and cultivation experiments (before and after microbial enrichments) were measured by inductively coupled plasma optical emission spectrophotometry (ICP-OES, Agilent Technologies 700 Series) and ion chromatography (Dionex ICS-600, CG12A column), respectively. The contents of DOC and DIC in the hot spring waters were determined by using an elementary analyzer (Unicuber, Elementar).

**4. 16S rRNA gene high-throughput sequencing and data processing**

Microbial community composition in the enriched nitrifying and denitrifying consortia was analyzed by using 16S rRNA gene-based high-throughput sequencing. One-ml aliquots of cultivation slurry from each hot spring were aseptically and anaerobically collected at the time of initial inoculation and during late log-stage of N redox reactions as determined by monitoring NH4+ and NO3- levels. Genomic DNA was extracted from these aliquots by using Chelex 100 (Sigma) in a 60-μL reaction mixture containing 50 μL of 10% Chelex solution and 10 μL of cell slurries. The conditions for Chelex real-time PCR were 120 s at 95 °C for initial denaturation, 35 cycles of denaturation at 95 °C for 15 s, annealing at 55 °C for 15 s, and extension at 72 °C for 45 s, and final extension at 72 °C for 5 min and then kept at 4 °C. The prokaryote universal primer set of 515F (5’-GTGYCAGCMGCCGCGGTA-3’) / 806R (5’-CCCCGYCAATTCMTTT RAGT-3’) with a 12-base Golay barcode (added to the 5’ end of 806R) that was unique to each sample was used for 16S rRNA gene amplification for high-throughput sequencing10, 11. At least three PCR replicates per sample were pooled to collect sufficient amplicons for high-throughput sequencing. The resulting PCR products were purified by DNA Gel Extraction Kit (Axygen, Union City, CA, USA) following the manufacturer’s protocol, and then were pooled with equimolar concentrations from each sample for sequencing (paired-up 2×250 bp). Sequencing reads were first assigned to each sample according to their unique barcodes, and paired reads were assembled using default settings. Primers (both the forward and reverse) were trimmed using FLASH (fast length adjustment of short reads)12. Subsequently, the assembled sequences were quality screened and de-multiplexed using QIIME (version 1.9.0) with the split_libraries_fastq.py script13. Briefly, low quality reads with 1) consecutive low-quality bases > 3 (quality score < 30), 2) consecutive high-quality bases < 75% of total bases, 3) ambiguous bases ≥ 1, and 4) length < 240 bp were removed. Chimeras were detected and removed by using the UCHIME module with de novo method in USEARCH14. The remaining high-quality sequences were truncated to a constant length of 240 bp, deduplicated, and then clustered into operational taxonomic units (OTUs, with 97% of similarity) using UPARSE-OTU algorithm15. Singletons were removed from each sample. Subsequently, taxonomies of the OTUs were assigned by using the QIIME pipeline. One sequence was randomly picked from each OTU as a representative and blasted against the Greengenes database (version 13_8, 80% threshold) using the ribosomal database project (RDP) classifier algorithm16. Chloroplast and non-hit sequences were eliminated from subsequent analysis. Alpha diversity indices (Chao1 and Shannon) were calculated at the 97% cutoff in the QIIME pipeline13.

The raw sequence data reported in this article have been deposited in the Genome Sequence Archive (Genomics, Proteomics & Bioinformatics 2021) of National Genomics Data Center (Nucleic Acids Res 2022), China National Center for Bioinformation / Beijing Institute of Genomics, Chinese Academy of Sciences (GSA: XXX) that is publicly accessible at https://ngdc.cncb.ac.cn/gsa.

**5. Mineralogical analysis**

The minerals formed by Fe(II) oxidation were first analyzed by X-ray diffraction (XRD). At the end of Fe(II) oxidation, the sample slurries from the cultures were collected, centrifuged, washed with anoxic ultrapure water, and dried in an anaerobic chamber. Subsequently, the obtained minerals were smeared on glass slides for XRD analysis with the use of a TD-3500 X-Ray Diffractometer using CuKα radiation, a rotating-anode generator, and power of 9000W (200 kV, 45 mA). The samples were scanned from 10 to 70° 2θ with a step size of 0.02° and a count time of 0.5 s per step.

Scanning electron microscopy (SEM) analyses were conducted using a Hitachi SU8010 instrument at an accelerating voltage of 3-15 kV. Each sub-sample was removed using the same procedure as above and then freeze-dried. Subsequently, the samples were mounted by sprinkling the sample powder on double-sided sticky copper tape attached to the SEM stub and sputter-coated with a thin layer of Pt. To determine the composition of the mineral products, these sub-samples were analyzed in spot mode using an Energy Dispersive X-ray Spectrometer (EDS).

Mössbauer spectroscopic analysis was conducted on selected representative samples for Fe mineralogy and speciation. Around 0.2 g of mineral formed by chemical and biological Fe(II) oxidation from each sample was collected by centrifugation and dried in an anaerobic glove box for Mössbauer analysis. The 57Co source (~50 mCi) at room temperature and linear acceleration in transmission mode were applied. The temperature of the sample was kept at room temperature under a helium atmosphere using a Janis cryostat. The obtained spectra were calibrated against that of α-Fe(0) foil. For spectra interpretation, Recoil® software (University of Ottawa, Ottawa, Canada) and Voigt-based models17 were used to determine the hyperfine parameters and the relative areas of Fe/Fe(III) species. The Lorentzian linewidth was held at 0.12 mm s-1, which was the linewidth measured on the spectrometer for an α-Fe foil of the same thickness. The relative peak areas (1:1 for doublets, 3:2:1:1:2:3 for sextets) were held constant throughout fitting. Each phase was fitted with only a single component.

Table S1. GPS location and physiochemical properties of the sampled hot springs in this study.

| **Area** | **Spring ID** | **GPS location and latitude (N, E, m)** | **Temp (oC)** | **pH** | **DO (mg/L)** | **Fe2+ (mg/L)** | **S2- (mg/L)** | **Si**  **(mg/L)** | **DOC (mg/L)** | **DIC (mg/L)** |
| --- | --- | --- | --- | --- | --- | --- | --- | --- | --- | --- |
| Rehai, Yunnan | **JMQ** | 24°57′3″, 98°26′9″, 1400  (Nearby group) | 85 | 9.42 | 0.12-0.23 | 0.02-0.025 | 3.25-7.5 | 265-460 | n.d. | n.d. |
| **HTJ** | 82.2-85 | 7.73-8.16 | 0.04 | 0 | 1.225 | 190 | n.d. | n.d. |
| **GMQ** | 82.0-94.1 | 9.50-9.66 | 0-0.03 | 0.035-0.05 | 4.85-5.0 | 315-440 | n.d. | n.d. |
| **HMZ2** | 24°57′00″, 98°26′17″, 1397  (Stream) | 70.0-75.0 | 8.65-9.51 | 1.5 | 0-0.64 | 0.24-0.25 | n.d. | 6.95 | 61.945 |
| **HMZ3** | 57.0-65.1 | 9.01-9.42 | 2.3-3.99 | 0.04-0.47 | 0.03-0.20 | 160-200 | 7.2 | 81.06 |
| **HMZ4** | 67.3-73.0 | 8.90-9.12 | 0.731-2.9 | 0-0.64 | 0.13-0.47 | 170-200 | 4.61 | 77.07 |
| **QQ** | 24°56′59″, 98°26′14″, 1397 | 62.3-71.0 | 6.60-7.24 | 0.80-1.50 | 0-0.42 | 0.02-0.07 | 200-230 | 6.44 | 91.765 |
| Ruidian, Yunnan | **DY** | 25°26′27″, 98°27′44″, 1676 | 83.1-93.0 | 7.77-8.88 | 1.08-2.75 | 0-0.03 | 0.01-0.03 | 170 | 6.48 | 102.09 |
| **YL** | 25°26′24″, 98°27′40″, 1685 | 75.0-79.0 | 7.36-8.96 | 2.30-2.46 | 0-0.07 | 0.03-0.04 | 150 | 4.65 | 113.47 |
| **GXS** | 25°26′28″, 98°27′36″, 1720 | 70.8-72.7 | 7.80-8.64 | 0.3-3.81 | 0.02-0.05 | 0-0.03 | 140 | 5.21 | 90.95 |
| **JZ** | 25°16′28″, 98°27′36″, 1714  (Nearby group) | 75-76.1 | 6.77-7.47 | 0.55-3.06 | 0.02-0.08 | 0.01-0.04 | 160 | 11.24 | 102.81 |
| **XJZ** | 66.0-66.5 | 7.32-8.09 | 2.00-3.97 | 0.01-0.04 | 0.01-0.03 | 160 | 8.17 | 110.98 |
| **JZL** | 31.3-47.0 | 7.48-7.85 | 3.1-5.08 | 0-0.06 | 0-0.02 | 115 | 26.73 | 91.3 |
| **JXH** | 25°26′28″, 98°27′36″, 1665  (Stream) | 58.0-67.5 | 7.35-8.65 | 3.40-4.50 | 0-0.065 | 0-0.03 | 120 | 8.36 | 126.35 |
| **JXL** | 43.0-47.7 | 6.97-8.60 | 3.95-5.96 | 0-0.04 | 0-0.03 | 120 | 6.4 | 102.15 |
| **ZY** | 25°26′28″, 98°27′36″, 1713 | 60.0-65.0 | 7.32-8.46 | 2.45-3.76 | 0-0.05 | 0.02-0.06 | 130 | 12.08 | 94.59 |
| **JY** | 25°26′22″, 98°27′39″, 1712 | 58.0-62.0 | 7.81-8.91 | 4.17 | 0.04-0.08 | 0.02-0.03 | 120 | 19.01 | 103.28 |
| **DTQQ** | 25°26′28″, 98°27′36″, 1713 | 52.0-57.2 | 6.50-6.73 | 2.85-4.10 | 0.575-0.900 | 0.03-0.04 | 110 | 20.52 | 120.11 |
| **GY** | 25°26′15″, 98°27′41″, 1688 | 49.0-52.1 | 6.33-7.06 | 1.40-3.35 | 1.50-2.17 | 0.03-0.05 | 100 | 14.71 | 126.42 |
| **JM** | 25°26′29″, 98°27′35″, 1688 | 50.0-60.6 | 7.42-8.47 | 3.72-5.40 | 0-0.02 | 0-0.03 | 150 | 8.24 | 93.96 |
| Houqiao, Yunnan | **BQ** | 25°17′57″, 98°17′27″,1741 | 58 | 7.57 | 0.52 | 0.02-0.07 | 0-0.04 | n.d. | 14.39 | n.d. |
| **JQ** | 25°18′2″, 98°17′32″, 1740 | 53.3 | 8.13 | 0.62 | 0.19-0.22 | 0-0.01 | n.d. | 3.91 | n.d. |
| **SJ** | 25°20′49″, 98°17′00″,1732 | 42.7 | 6.48 | n.d. | 1.58-1.65 | 0.04-0.05 | n.d. | 9.28 | n.d. |
| Dagejia,  Xizang | **DG0-1** | 29°35'56", 85°45'2", 5052  (Stream) | 65 | 8.7 | 0.883 | 0.1 | 0.06 | 100 | 0.50 | 69.75 |
| **DG0-3** | 46 | 8.77 | 3.7 | 0 | 0 | 100 | 0.27 | 67.87 |
| **DG1** | 29°35'54", 85°45'4", 5055  (Stream) | 76.1 | 8.44 | 0.257 | 0 | 0.03 | 80 | 2.73 | 70.45 |
| **DG1-1** | 67 | 8.66 | 0.542 | 0 | 0.04 | n.d. | 5.60 | 68.94 |
| **DG1-2** | 58 | 8.55 | 1.3 | 0 | 0.02 | n.d. | 6.08 | 70.33 |
| **DG1-3** | 49.3 | 8.65 | 4 | 0 | 0 | 80 | 0.90 | 71.90 |
| **DG1-4** | 40.2 | 8.5 | 3.6 | 0 | 0.01 | n.d. | 2.72 | 72.05 |
| **DG2** | 29°35'53", 85°45'2", 5055  (Stream) | 75 | 8.71 | 1 | 0.01 | 0.1 | 90 | 0.80 | 65.11 |
| **DG2-1** | 55 | 8.49 | 1.9 | 0 | 0 | n.d. | 0.81 | 69.09 |
| **DG3** | 29°35'56", 85°45'2", 5054 | 78.8 | 8.72 | 0.073 | 0.13 | 0.14 | 80 | 2.36 | 66.26 |
| **DG4** | 29°36'3", 85°44'58", 5073  (Pool) | 81 | 8.88 | 0.304 | 0 | 0.16 | 90 | 6.75 | 55.53 |
| **DG4-1** | 67 | 8.72 | n.d. | n.d. | n.d. | n.d. | n.d. | n.d. |
| **DG4-2** | 58 | 9.06 | 0.8 | 0 | 0.12 | 80 | 10.70 | 58.22 |
| **DG4-3** | 49 | 8.82 | n.d. | n.d. | n.d. | n.d. | n.d. | n.d. |
| **DG4-4** | 37 | 8.79 | 3.5 | 0 | 0 | n.d. | 0.80 | 71.27 |
| **DG5** | 29°36'3", 85°44'56"E, 5070  (Nearby group) | 54 | 7.77 | n.d. | 0.07 | 0.02 | 100 | 4.59 | 72.33 |
| **DG6** | 68 | 8.49 | n.d. | 0.05 | 0.13 | 110 | 1.81 | 70.83 |
| **DG7** | 78 | 8.36 | n.d. | 0.22 | 0.04 | 100 | 9.77 | 68.42 |
| Quzhuomu,  Xizang | **QZM1** | 28°14'37", 91°48'40", 4508 | 64 | 6.61 | 0.171 | 2.39 | 0.01 | 30 | 2.03 | 34.95 |
| **QZM2** | 28°14'37", 91°48'40", 4508 | 64.7 | 6.59 | 0.69 | 2.41 | 0 | n.d. | 2.08 | 35.90 |
| **QZM3** | 28°14'37", 91°48'40", 4508 | 64.5 | 7.71 | 0.158 | 2.13 | 0 | 40 | 1.82 | 41.18 |
| **QZM4** | 28°14'37", 91°48'39", 4508 | 62.8 | 6.45 | 1.4 | 2.33 | 0 | 40 | 2.47 | 38.38 |
| **QZM5** | 28°14'40", 91°48'36", 4503 | 65 | 6.75 | n.d. | 1.02 | 0 | 30 | 3.33 | 42.85 |
| **QZM6** | 28°14'40", 91°48'36", 4503 | 65.4 | 6.65 | n.d. | 0.87 | 0.01 | 50 | 1.95 | 44.58 |
| **QZM7** | 28°14'40", 91°48'36", 4503  (Nearby Group) | 65.7 | 6.75 | n.d. | 0.06 | 0 | 50 | 3.28 | 44.35 |
| **QZM7-2** | 40 | n.d. | n.d. | 0.08 | 0.01 | n.d. | 1.41 | 37.32 |
| **QZM7-4** | 33.8 | n.d. | n.d. | 0.1 | 0 | n.d. | 5.62 | 42.40 |

n.d.: not detected

Table S2. The concentration of major cations and anions in the water of the sampled hot springs.

| **Spring ID** | **NH4+** | **Li+** | **Na+** | **K+** | **Mg2+** | **Ca2+** | **NO2-** | **NO3-** | **F-** | **Cl-** | **Br-** | **SO42-** | **PO43-** |
| --- | --- | --- | --- | --- | --- | --- | --- | --- | --- | --- | --- | --- | --- |
| **mg/L** | | | | | | | | | | | | |
| **HMZ2** | 0 | 1.74 | 431.25 | 65.91 | 0 | 5.2 | 12.42 | 1.86 | 7.60 | 353.58 | 2.40 | 40.32 | 7.60 |
| **HMZ3** | 0 | 1.74 | 426.42 | 65.52 | 0 | 3.2 | 12.42 | 1.24 | 7.79 | 361.04 | 2.40 | 43.20 | 7.60 |
| **HMZ4** | 0 | 1.44 | 361.79 | 54.21 | 0 | 4.0 | 13.34 | 1.24 | 8.36 | 376.66 | 2.40 | 45.12 | 7.60 |
| **QQ** | 0.72 | 0.57 | 226.55 | 28.47 | 4.56 | 19.6 | 0.46 | 1.71 | 3.61 | 216.20 | 1.60 | 109.44 | 0 |
| **DY** | 0 | 0.69 | 362.48 | 36.27 | 2.88 | 12.4 | 17.94 | 2.48 | 6.46 | 165.79 | 0 | 32.64 | 11.40 |
| **YL** | 0 | 0.78 | 380.19 | 39.00 | 2.64 | 18.0 | 21.16 | 3.10 | 7.41 | 177.50 | 1.60 | 39.36 | 13.30 |
| **GXS** | 0 | 0.12 | 126.5 | 13.26 | 0.48 | 7.6 | 17.94 | 1.24 | 6.46 | 163.30 | 1.60 | 28.8 | 0 |
| **JZ** | 0 | 0.75 | 386.17 | 39.39 | 2.64 | 31.6 | 17.02 | 0.62 | 5.89 | 145.20 | 0 | 31.68 | 0 |
| **XJZ** | 0 | 0.72 | 380.88 | 39.00 | 3.12 | 29.2 | 17.94 | 0.62 | 6.27 | 155.85 | 0 | 30.72 | 0 |
| **JZL** | 0 | 0.78 | 405.49 | 40.95 | 2.88 | 26.0 | 20.24 | 1.24 | 6.27 | 156.20 | 0 | 29.76 | 0 |
| **JXH** | 0 | 0.27 | 180.55 | 18.72 | 0.96 | 15.6 | 17.02 | 1.24 | 5.89 | 144.49 | 0 | 28.80 | 11.40 |
| **JXL** | 0 | 0.54 | 304.29 | 34.32 | 2.64 | 29.6 | 13.80 | 9.30 | 4.37 | 122.12 | 0 | 35.52 | 0 |
| **ZY** | 0 | 0.66 | 357.88 | 42.51 | 3.36 | 25.2 | 17.94 | 2.48 | 7.98 | 166.50 | 1.60 | 33.60 | 11.40 |
| **JY** | 0 | 0.66 | 345.46 | 39.78 | 2.64 | 26.8 | 16.56 | 1.24 | 5.89 | 140.23 | 0 | 27.84 | 0 |
| **DTQQ** | 0 | 0.39 | 212.52 | 24.57 | 2.40 | 20.8 | 12.42 | 1.86 | 4.37 | 114.31 | 0 | 29.76 | 11.40 |
| **GY** | 0.18 | 0.45 | 193.20 | 23.79 | 3.12 | 16.4 | 11.04 | 1.86 | 3.42 | 92.30 | 0 | 25.92 | 10.45 |
| **JM** | 0 | 0.72 | 380.88 | 38.61 | 2.64 | 28.0 | 20.70 | 1.86 | 6.84 | 168.98 | 0 | 45.12 | 12.35 |
| **BQ** | 0 | 0.21 | 261.05 | 13.65 | 0 | 22.4 | 14.26 | 1.24 | 9.69 | 29.82 | 1.60 | 32.64 | 6.65 |
| **JQ** | 0 | 0.12 | 186.53 | 10.14 | 0.48 | 20.0 | 14.26 | 1.24 | 8.74 | 32.31 | 1.60 | 14.40 | 0 |
| **SJ** | 0 | 0.33 | 356.96 | 38.61 | 4.08 | 24.4 | 22.54 | 1.24 | 6.08 | 72.07 | 0 | 3.84 | 0 |
| **DG0-1** | 0 | 5.69 | 561.26 | 45.60 | 0 | 8.1 | 15.90 | 2.36 | 24.20 | 154.70 | 1.81 | 96.53 | 6.56 |
| **DG0-3** | 0 | 5.77 | 559.24 | 45.47 | 0 | 7.0 | 15.83 | 1.22 | 26.33 | 178.03 | 1.95 | 99.36 | 0 |
| **DG1** | 0 | 5.64 | 547.62 | 43.06 | 0 | 5.6 | 0 | 1.29 | 22.92 | 146.42 | 1.88 | 91.30 | 0 |
| **DG1-1** | 0 | 5.26 | 512.47 | 41.55 | 0 | 7.11 | 15.37 | 2.18 | 20.99 | 134.39 | 1.81 | 81.86 | 0 |
| **DG1-2** | 0 | 5.52 | 526.24 | 41.39 | 0 | 7.14 | 16.15 | 1.65 | 22.09 | 140.02 | 1.84 | 85.84 | 0 |
| **DG1-3** | 0 | 5.62 | 566.83 | 44.17 | 0 | 7.39 | 16.16 | 1.02 | 23.80 | 150.99 | 1.84 | 89.41 | 0 |
| **DG1-4** | 0 | 5.74 | 557.98 | 45.39 | 0 | 7.13 | 15.74 | 0.99 | 23.52 | 149.71 | 1.83 | 89.12 | 0 |
| **DG2** | 0 | 5.80 | 448.03 | 43.02 | 0.43 | 4.35 | 12.20 | 3.20 | 18.11 | 114.47 | 1.43 | 76.83 | 6.10 |
| **DG2-1** | 0 | 6.37 | 484.68 | 47.22 | 0.34 | 3.39 | 14.10 | 1.81 | 19.58 | 122.23 | 1.45 | 74.65 | 0 |
| **DG3** | 0 | 5.32 | 512.45 | 42.46 | 0 | 7.18 | 16.55 | 1.56 | 23.26 | 147.98 | 1.83 | 88.84 | 0 |
| **DG4** | 0 | 5.24 | 498.17 | 47.72 | 0.02 | 0 | 12.07 | 1.04 | 24.26 | 149.68 | 1.79 | 89.33 | 0 |
| **DG4-2** | 0 | 5.64 | 522.39 | 51.31 | 0.15 | 0 | 12.30 | 1.00 | 25.11 | 155.00 | 1.80 | 91.37 | 0 |
| **DG4-4** | 0 | 5.87 | 592.41 | 45.69 | 1.12 | 8.91 | 0.88 | 0.99 | 0 | 1.88 | 1.97 | 324.34 | 0 |
| **DG5** | 0 | 5.23 | 511.64 | 50.17 | 0.07 | 3.63 | 13.90 | 1.78 | 19.84 | 121.00 | 1.46 | 73.52 | 0 |
| **DG6** | 0 | 5.53 | 521.26 | 52.74 | 0.92 | 2.91 | 18.19 | 2.93 | 24.64 | 180.51 | 2.44 | 99.95 | 7.51 |
| **DG7** | 0 | 4.82 | 463.50 | 44.71 | 0.02 | 2.48 | 15.90 | 1.38 | 21.60 | 136.97 | 1.79 | 85.52 | 0 |
| **QZM-1** | 0 | 4.89 | 334.44 | 21.11 | 9.34 | 70.49 | 9.35 | 1.87 | 0.97 | 186.82 | 1.57 | 370.71 | 0 |
| **QZM-2** | 0 | 3.10 | 214.17 | 33.60 | 15.53 | 193.89 | 9.28 | 1.88 | 0.76 | 177.33 | 1.56 | 351.45 | 0 |
| **QZM-3** | 0 | 3.13 | 209.47 | 35.02 | 13.53 | 183.94 | 9.61 | 1.60 | 0.47 | 181.35 | 1.65 | 294.65 | 0 |
| **QZM-4** | 0 | 2.88 | 194.24 | 32.11 | 14.52 | 184.48 | 8.46 | 2.18 | 0 | 154.21 | 1.53 | 290.10 | 0 |
| **QZM-5** | 0 | 3.20 | 229.35 | 36.44 | 15.84 | 211.50 | 8.49 | 2.22 | 0 | 164.72 | 1.51 | 334.60 | 0 |
| **QZM-6** | 0 | 3.27 | 240.78 | 36.88 | 15.06 | 205.96 | 10.26 | 1.94 | 0.95 | 188.77 | 1.54 | 375.91 | 0 |
| **QZM-7** | 0 | 3.02 | 280.78 | 39.37 | 16.33 | 211.40 | 12.26 | 1.65 | 0 | 181.45 | 1.84 | 335.16 | 0 |
| **QZM-7-2** | 0 | 2.87 | 290.49 | 39.57 | 16.18 | 215.70 | 13.63 | 1.37 | 0 | 220.88 | 2.38 | 432.99 | 0 |
| **QZM-7-4** | 0 | 2.91 | 293.50 | 39.12 | 16.02 | 195.39 | 11.74 | 1.61 | 0 | 195.78 | 1.84 | 365.35 | 0 |

Table S3. Iron minerals in banded iron formations at different geological time as summarized from previous studies (supplied as individual file)

Table S4. Experimental set-up for chemodenitrification.

| Exp sets | NO2-  (0.2mM) | Fe(II)  (1mM) | Cl-  (1mM) | HCO3-  (1mM) | SiO32-  (2 mM) | PIPEs  (10mM) |
| --- | --- | --- | --- | --- | --- | --- |
| a: Freshwater | **√** | **√** |  |  |  | **√** |
| b: Cl- | **√** | **√** | **√** |  |  | **√** |
| c: HCO3- | **√** | **√** | **√** | **√** |  | **√** |
| d: Si | **√** | **√** | **√** | **√** | **√** | **√** |

Table S5. Experimental set-up for Fe(II) oxidation by thermophilic *Thermus* sp.

| Exp sets | NO3-  (2 mM) | Fe(II)  (5 mM) | *Thermus* sp.  (1×107 cells/mL) | SiO32-  (2 mM) | PIPEs  (10 mM) | HCO3-  (1 mM) |
| --- | --- | --- | --- | --- | --- | --- |
| a: Denitrification control | **√** |  | **√** |  | **√** | **√** |
| b: Abiotic control | **√** | **√** |  |  | **√** | **√** |
| c: Without Si | **√** | **√** | **√** |  | **√** | **√** |
| d: With Si | **√** | **√** | **√** | **√** | **√** | **√** |

Table S6. Experimental set-up for Fe(II) oxidation by thermophilic denitrifying consortia enriched from hot springs (DG1-1, DG1-2 and DG1-3) in this study

| Exp sets | NO3-  (2 mM) | Fe(II)  (5 mM) | denitrifying consortia |
| --- | --- | --- | --- |
| a: NO3-+Fe(II) | **√** | **√** |  |
| b: Fe(II)+cells |  | **√** | **√** |
| c: NO3-+Fe(II)+cells | **√** | **√** | **√** |

**Supplemental Results and Discussion**

**1. Characteristics of the hot springs**

Over 50 hot springs were collected from five locations in the Xizang-Yunnan geothermal zone (Fig. S1), with the temperature range from 31.3 °C to 93 °C and pH from 6.33 to 9.66 (Table S1). DO was generally low, especially in high temperature springs. The content of dissolved Fe2+ was also low in most springs but was of substantial level in some springs, such as HMZ4, QQ, DTQQ, GY, SJ and QZM springs, indicating a continuous supply from the source water. Dissolved Si, DOC and DIC were lower in the Xizang hot springs than those in the Yunnan springs, while the contents of SO42- and Ca2+ showed an opposite trend (Tables S1 and S2).

**2. Nitrification at different temperatures**

The conversion of NH4+ by the nitrifying consortia showed systematic variation with temperature. NH4+ was stoichiometrically oxidized to NO2-, which was then accumulated at temperatures 75 and 65 oC (Fig. S2-a, b) and was further oxidized to NO3- by some enrichments at 55 oC and by all enrichments at 40 oC (Fig. S2-c, d). Furthermore, variation of nitrifying microorganisms in the enrichments supported the observed changes in nitrification products. *Nitrosocaldus*-related thermophilic ammonia oxidizing archaea (AOA) were widely recovered from the enrichments, especially those at temperature above 55 oC, while *Nitrosotenuis-* and *Nitrososphaera-*related mesophilic AOA were only recovered from the enrichments at 40 oC (Fig. S3). In addition, *Nitrospira*-related nitrite oxidizing bacteria (NOB) were only detected in the consortia at 40 oC and 55 oC (e.g., DTQQ), which supported the oxidation of NH4+ to NO2- and then to NO3- in these treatments. In contrast, such canonical NOB were not found in the cultures with higher temperatures (75 and 65 oC). Notably, NO2- accumulation did not occur in BQ at 55 oC, suggesting that some unidentified NOB might exist.


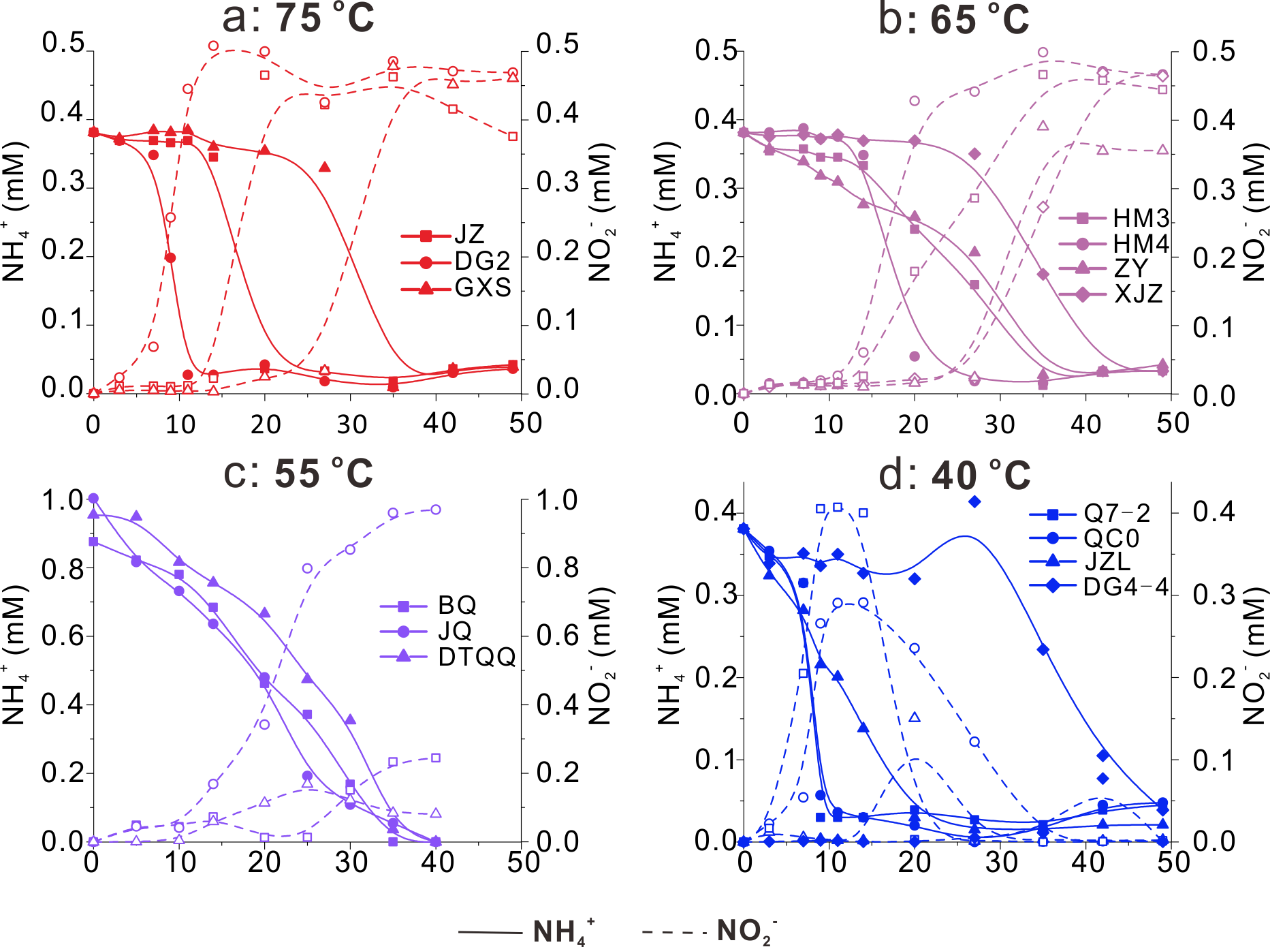


**Fig. S2** Time-course dynamics of ammonia oxidation and nitrite production by representative thermophilic nitrifying consortia at different temperatures.

**
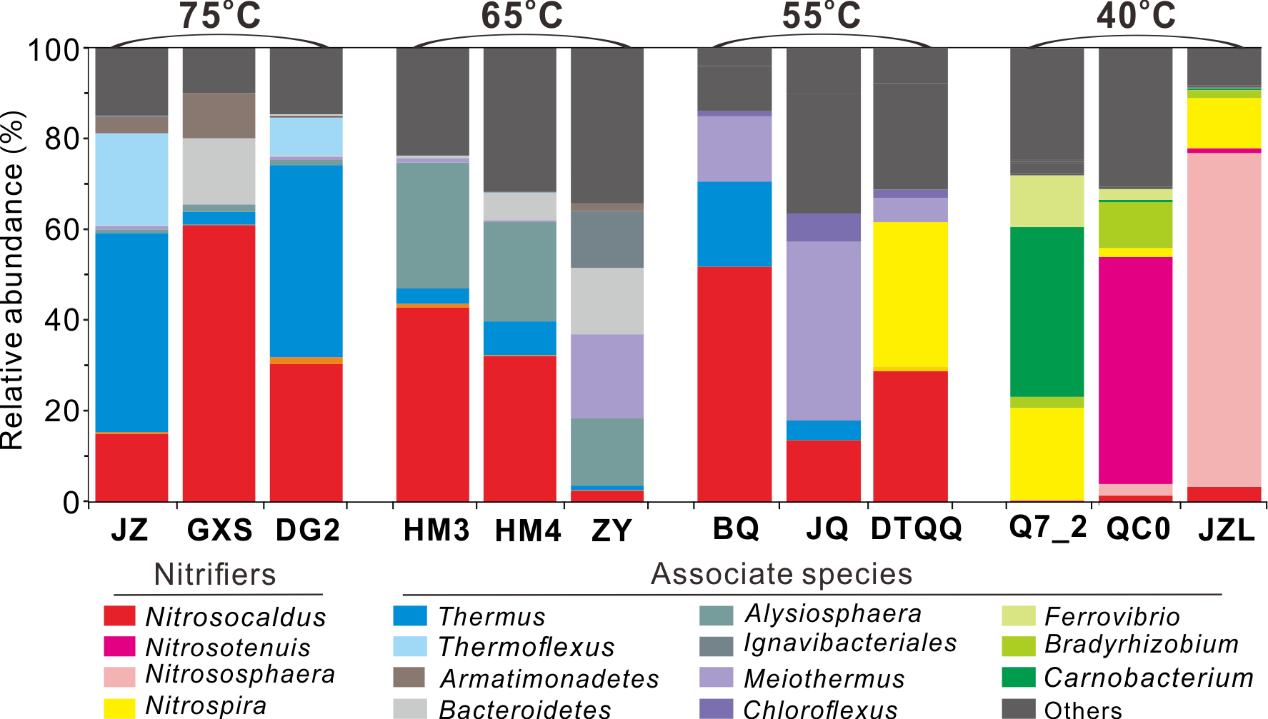
**

**Fig. S3** Microbial composition of representative nitrifying consortia from hot springs of different temperatures.

**2. Denitrification at different temperatures**

Denitrification also widely occurred in the studied hot springs. Three groups of denitrifying enrichments were analyzed for their microbial compositions including two groups from two hot spring flow channels (DG1-1, -2 and -3; and DG4-1, -2 and -3) and one group from three nearby springs (DG5, DG6 and DG7) that shared the same water source but with different temperatures (Fig. S1b). *Hydrogenobacter* and *Thermus* were the two most dominant groups in the denitrifying consortia, with the former being more enriched at higher temperatures (75 oC, 65 oC,) and the latter being more abundant at lower temperatures (55 oC, 50 oC, Fig. S4). Detailed denitrifying behaviors were investigated in one of the denitrifying sets i.e., DG1-1, -2 and -3 (Fig. S5). NO3- was stoichiometrically reduced to NO2- at different temperatures, but the corresponding accumulation of NO2- varied: NO2- accumulation was the highest in DG1-1 at 65 oC (Fig. S5-a), followed by DG1-2 at 55 oC (Fig S5-b), and was completely absent in DG1-3 at 50 oC (Fig S5-c).

**
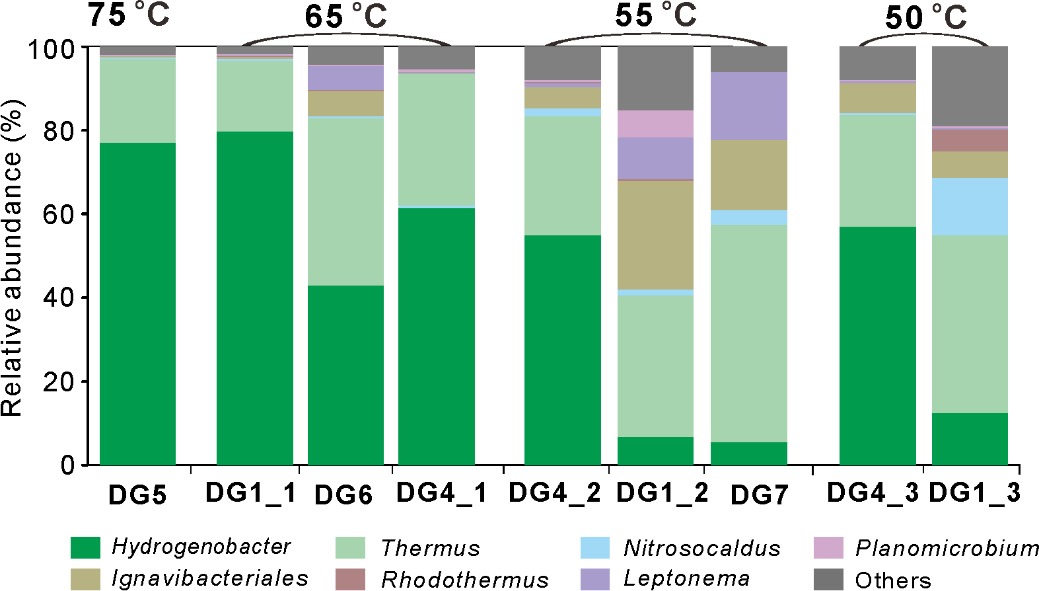
**

**Fig. S4** Microbial composition of representative denitrifying consortia from hot springs of different temperatures.

**
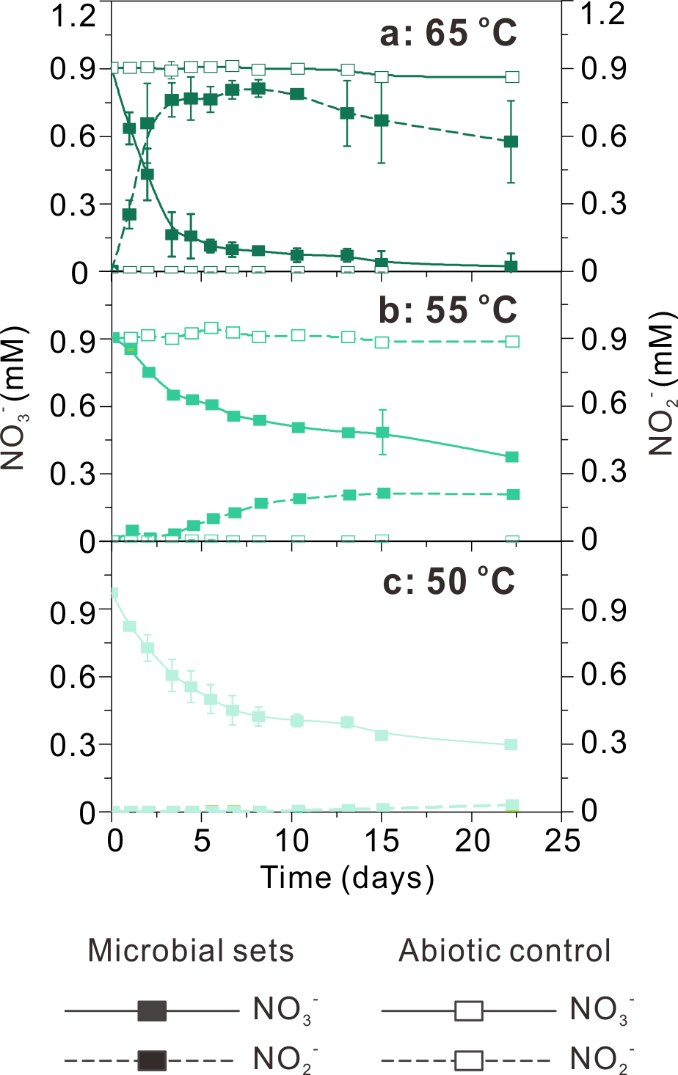
**

**Fig. S5** Time-course dynamics of nitrite production by representative thermophilic denitrifying consortia. Panels **a, b** and **c** denote DG1-1 at 65 oC, DG1-2 at 55 oC, and DG1-3 at 50 oC, respectively.

**Fe(II) oxidation coupled with NO2- reduction (chemodenitrification)**

High temperature and the presence of HCO3- significantly stimulated Fe(II) oxidation and NO2- reduction (Fig. S6). The mineral products formed by chemodenitrification showed a systematic change with temperature and the presence of ions. In the cultivation system with Cl-, the minerals formed at 25 oC and 40 oC were dominated by lepidocrocite, and contained a small amount of goethite (Fig. S7-a1, a2); in contrast, the dominant mineral formed at 55 oC and 75 oC was magnetite, with a small amount of goethite and lepidocrocite (Fig. S7-a3, a4). In the cultivation system with HCO3-, however, goethite instead of lepidocrocite was the dominant mineral formed at 25 oC and 40 oC, with a small amount of lepidocrocite and magnetite (Fig. S7-b1, b2; Fig. S8-a); magnetite became the predominantly precipitated mineral when temperature was higher than 55 oC (Fig. S7-b3, b4; Fig. S8-b). In the cultivation system with Si, no well-crystallized iron (hydro)oxides were precipitated (Fig. S7-c), while only poorly crystallized iron silicates, cronstedtite [ideal formula: Fe2+2Fe3+((Si,Fe3+)2O5)(OH)4], was identified at 75 oC by XRD (Fig. S7-c3). Mössbauer spectroscopy further confirmed the presence of cronstedtite and greenalite formed at 55 oC (Fig. S8-c).


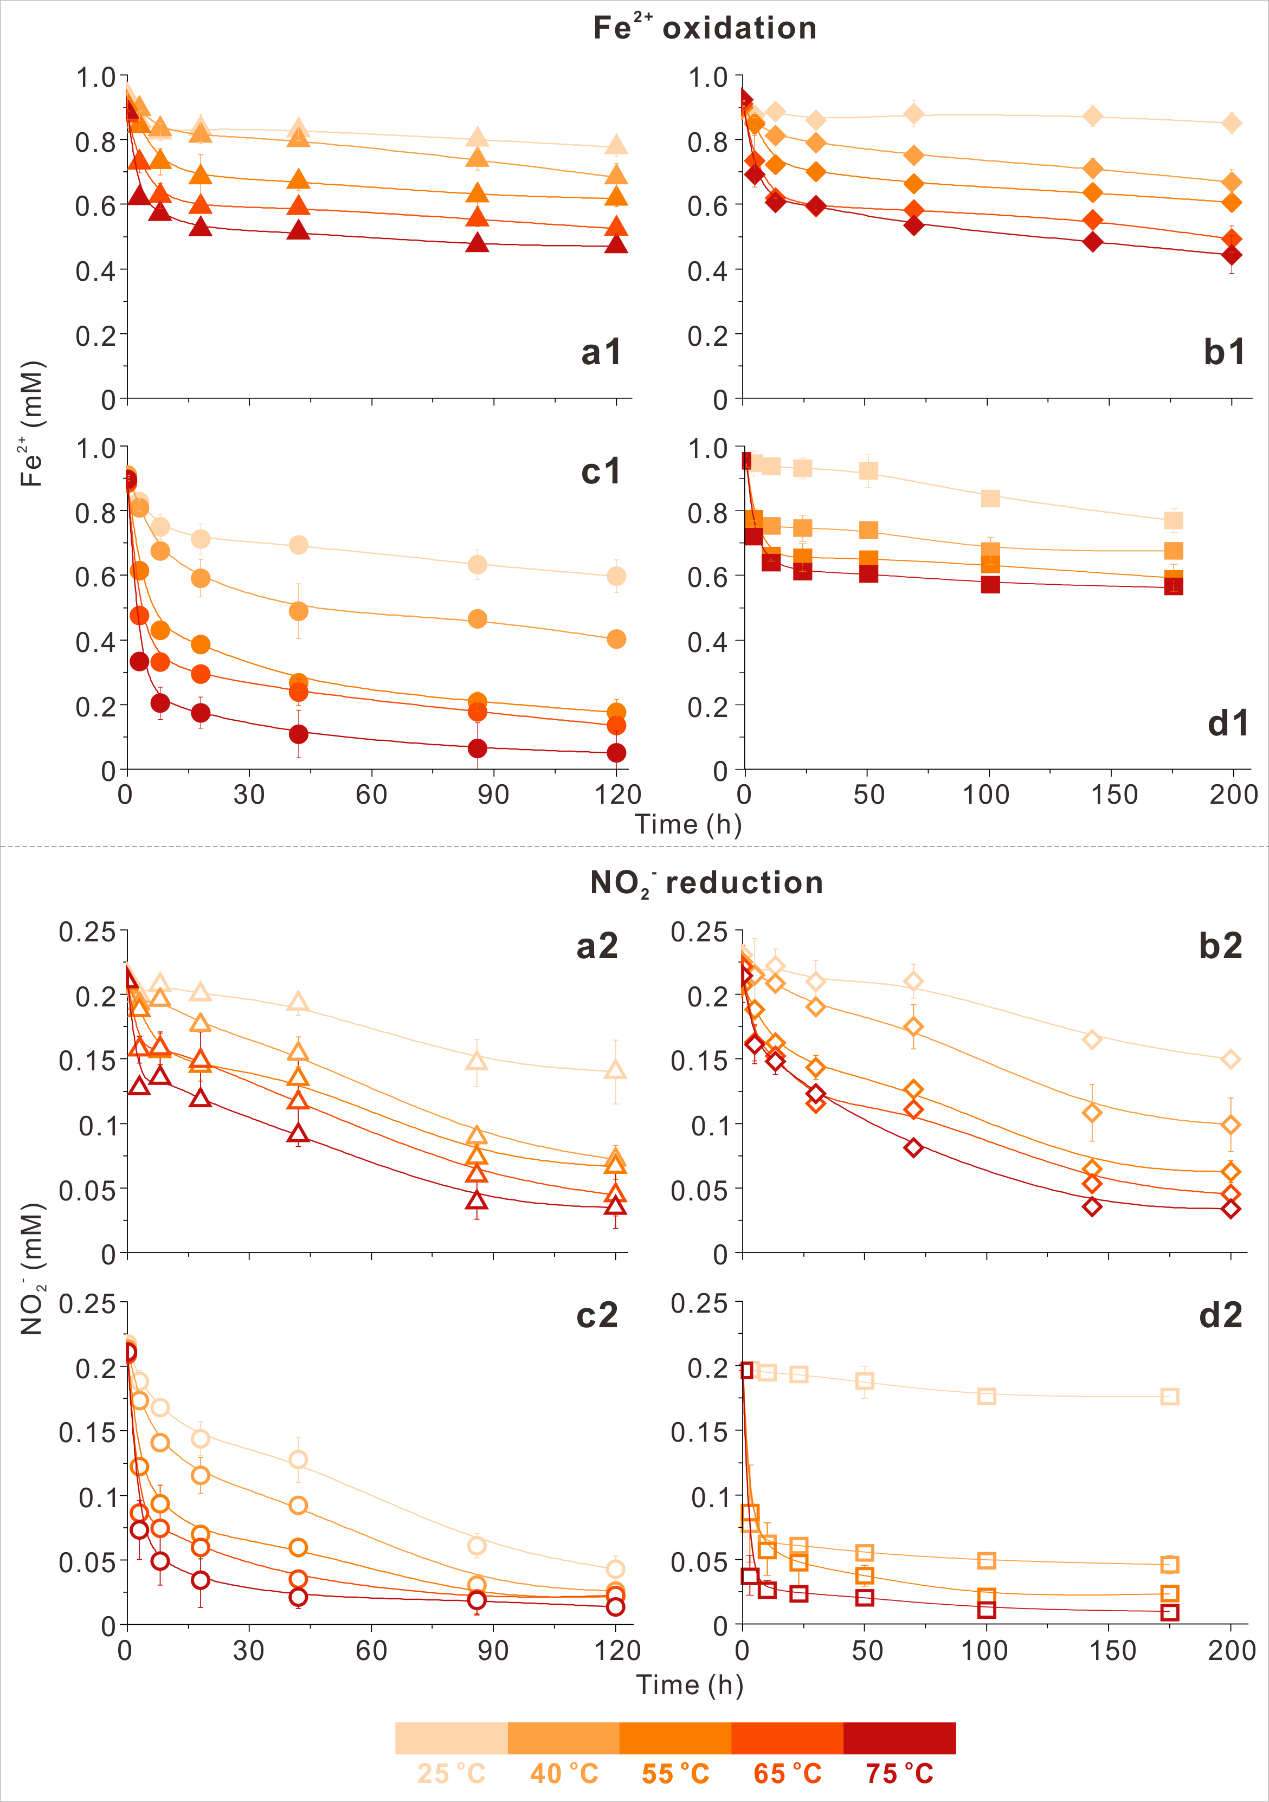


**Fig. S6** Fe(II) oxidation (**a1-d1**) and NO2- reduction (**a2-d2**) by chemodenitrification under different temperatures in **a**) freshwater, **b**) with Cl-, **c**) with HCO3- and **d**) with dissolved Si.


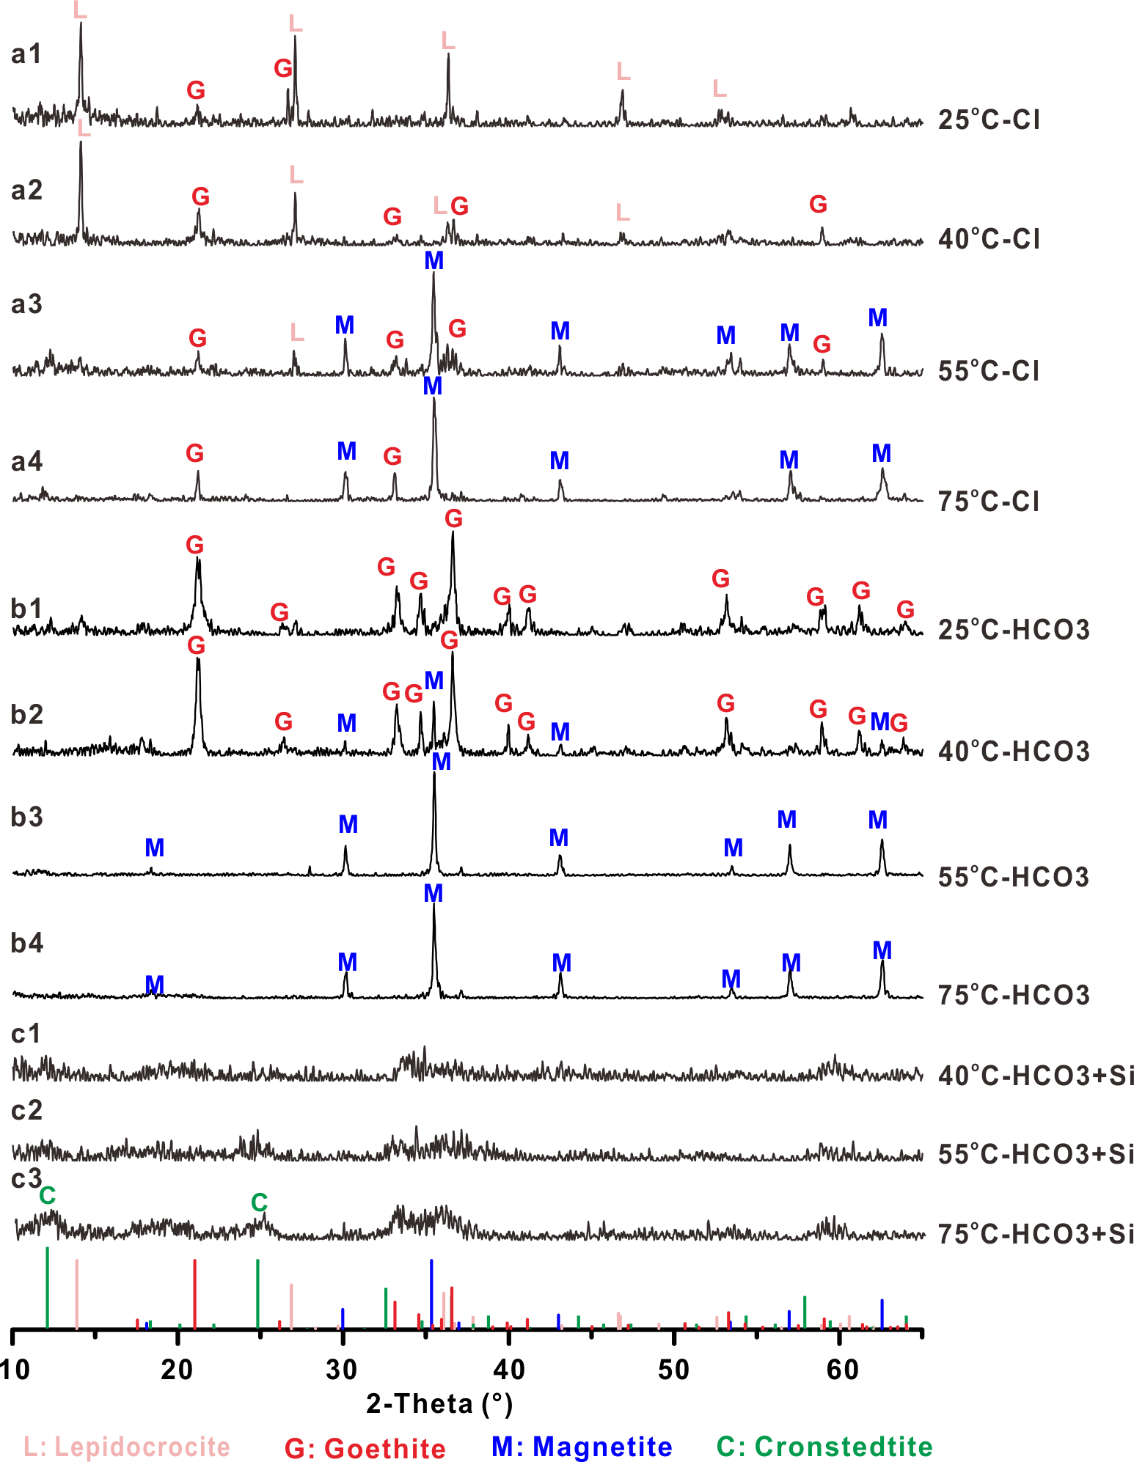


**Fig. S7** Minerals precipitated by chemodenitrification at different temperatures. Panels **a** and **b** show the effect of Cl- and HCO3-, respectively; Panel **c** shows the co-effect of HCO3- and Si.


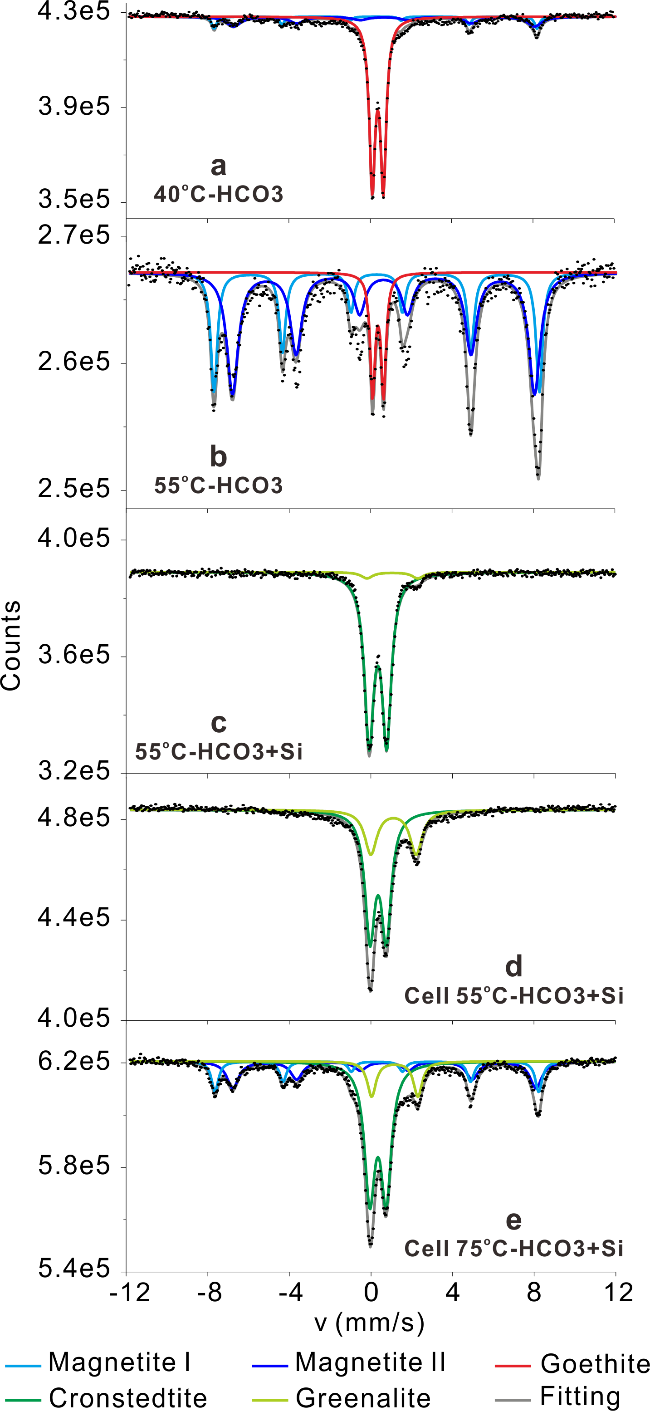


**Fig. S8** Room-temperature Mössbauer spectra of minerals precipitated by chemical Fe(II) oxidation by NO2- (**a-c**) and biological Fe(II) oxidation with NO3- (**d, e**) under different temperatures with the presence of either HCO3- (1 mM), Si (1 mM), or both. The black dots are measured data and grey lines are fitting patterns. The blue sextets are of Fe3+ and Fe2+ in magnetite, the orange doublets are for Fe3+ in goethite, the dark green doublets are for Fe3+ and Fe2+ in cronstedtite, and the light green doublets are for greenalite.

SEM observations revealed different morphologies of iron minerals formed by chemodenitrification (Fig. S9). In the presence of Cl-, lepidocrocite showed lath-like and needle (whisker)-like morphologies at 25 oC and 40 oC, while goethite particles with distorted cubic morphology were also observed at 40 oC (Fig. S9-a1, a2); in contrast, magnetite particles with well-developed octahedral and dodecahedral faces were formed at 55 oC, and these magnetite particles reached micrometer-scale (especially at high temperature; Fig. S9-a3, a4). In the presence of HCO3-, goethite particles showed self-oriented petal-like morphologies at 25 oC and 40 oC, and extensive octahedral magnetite were formed at 40 oC (Fig. S9-b1, b2), while magnetite particle aggregates were developed at 55 oC and 75 oC (Fig. S9-b3, b4). In the presence of both Si and HCO3-, the minerals appeared as flower-like aggregates of greenalite at 40 oC (Fig. S8-c1), and as needle-like aggregates of cronstedtite at 55 oC and 75 oC (Fig. S9-c2, c3) . Greenalite was not detectable by XRD probably due to its low crystallization 18. The presence of greenalite was supported by the Mössbauer spectroscopy (Fig. S8-c, d, e).


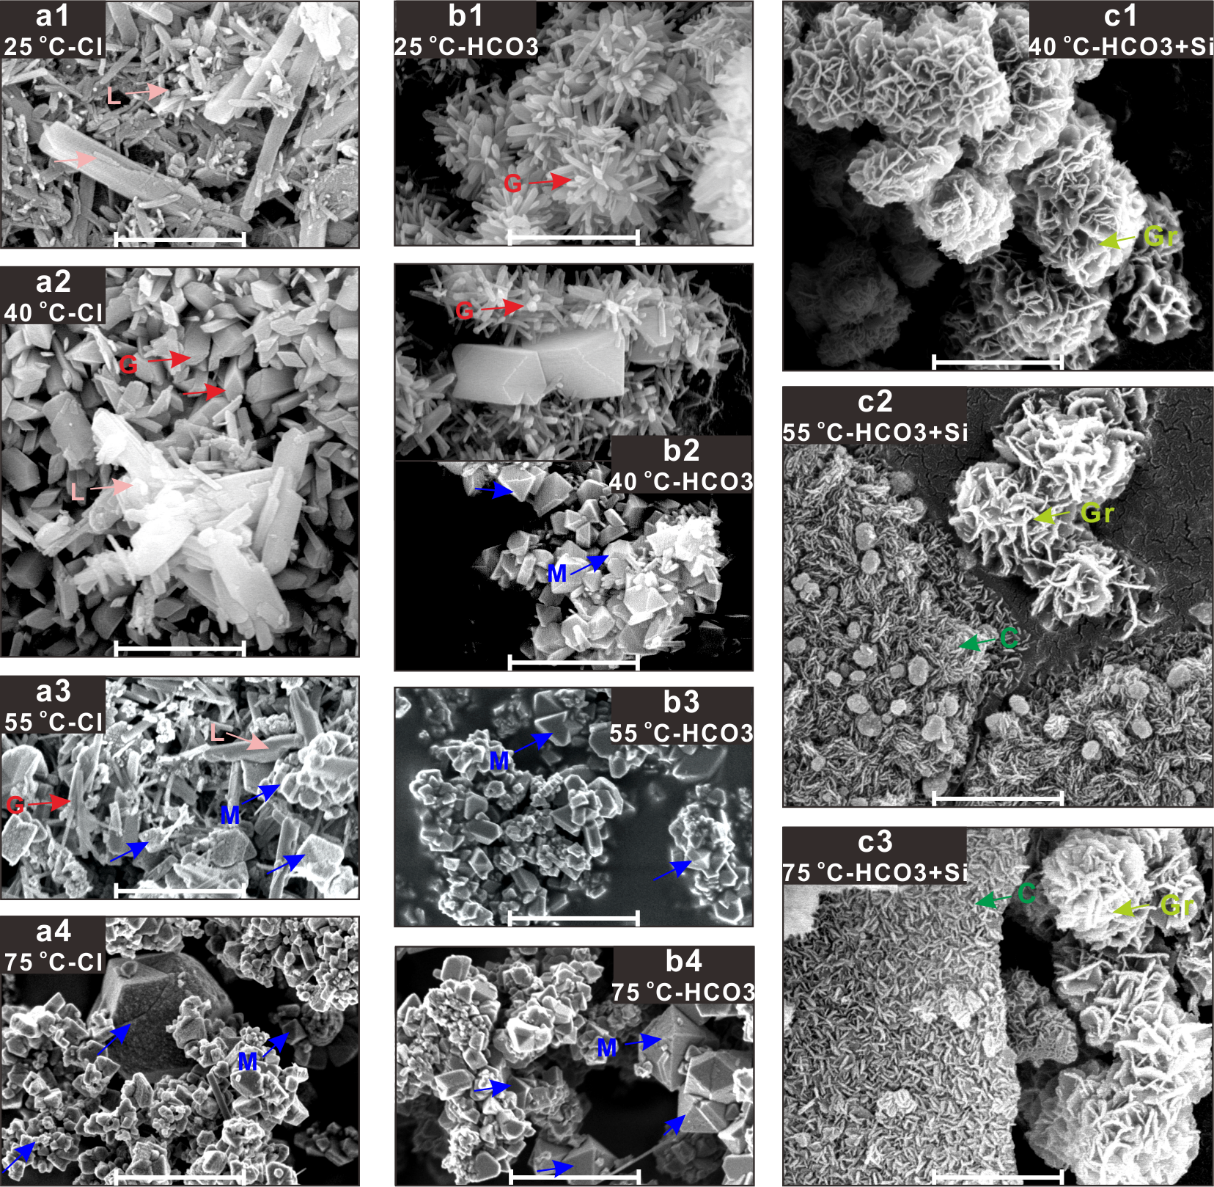


**Fig. S9** SEM observation of euhedral Fe minerals formed by chemodenitrification in the cultivation experiments. Panel **a** shows the iron minerals formed in the presence of Cl-; Panel **b** shows the iron minerals formed in the presence of HCO3-; panel **c** shows the iron minerals formed in the presence of HCO3- and Si. The labels are same as in Fig. S7. The scale bar in each panel is for 1μm. Green arrows and label “L” indicate lepidocrocite particles that of needle and lath-like shape; Orange arrows and label “G” indicate goethite particles that of distorted cubic and flowery structure; Blue arrows and label “M” indicate magnetite particles that of octahedron and dodecahedrons shapes or with octahedral and dodecahedral faces. Green arrows and label “C” indicate cronstedtite particles that of needle aggregates; Light green arrows and label “Gr” indicate green rust particles that of flower aggregates.

**3. Fe(II) oxidation coupled with NO3- reduction by *Thermus* sp.**

*Thermus* sp. was isolated from one Xizang hot spring at 65 oC by using T5 medium (glucose 1 g/L, Lotus root starch 1 g/L, Yeast extract 2 g/L, Tryptone 0.5 g/L, CaCO3 0.5g/L, Trace element, 1 mL). In the denitrification control (without Fe(II)), *Thermus* sp. stoichiometrically reduced NO3- to NO2-, and the NO3- reduction exhibited a higher extent and faster rate at higher temperatures (Fig. S10-a). In the abiotic control (without inoculation), neither NO3- reduction nor Fe(II) oxidation occurred (Fig. S10-b). In the experimental set without Si, higher temperature (75 oC) significantly enhanced NO3- reduction and Fe(II) oxidation (Fig. S10-c), probably due to the high denitrification capacity of the strain to produce more NO2 at 75 oC (Fig. S10-a), but such promotion effect of temperature was not observed in the presence of Si (Fig. S10-d). Furthermore, no NO2- was accumulated during Fe(II) oxidation by NO3- reduction (Fig. S10-c2, d2) either with or without Si.


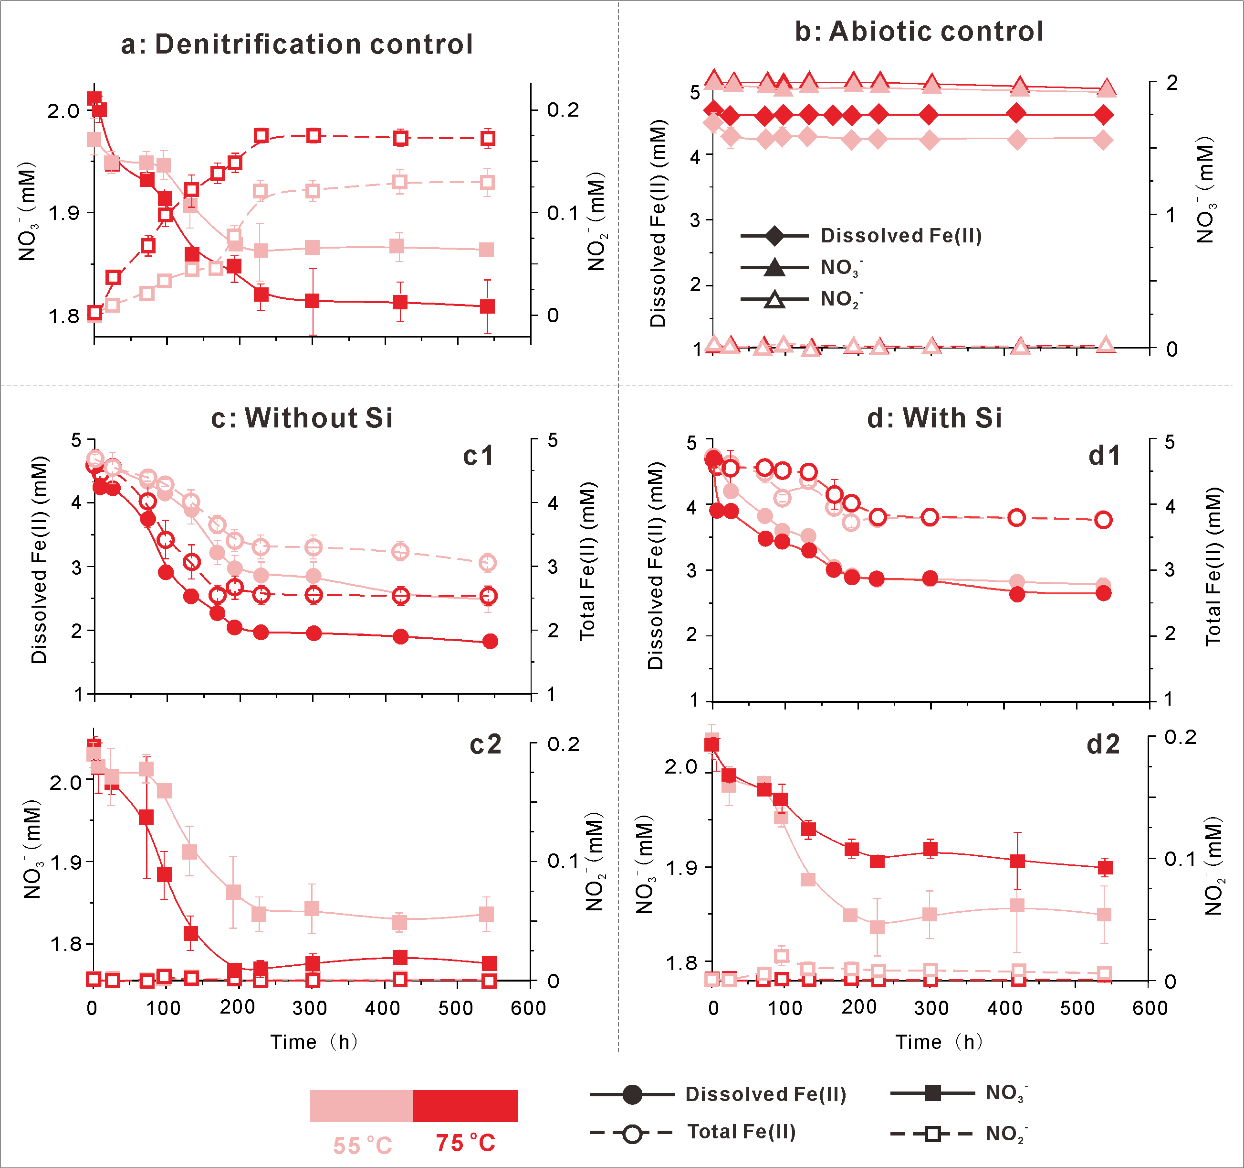


**Fig. S10** Microbial Fe(II) oxidation and NO3- reduction by *Thermus* sp. at high (75 oC) and low (55 oC) temperatures. Panel **a:** denitrification control without Fe(II); Panel **b:** abiotic control without inoculation of *Thermus* sp.;Panel **c:** Fe(II) oxidation (c1) and NO3- reduction (c2) by *Thermus* sp.in the absence of Si; and Panel **d:** Fe(II) oxidation (d1) and NO3- reduction (d2) by *Thermus* sp in the presence of Si.

XRD was employed to detect the minerals formed by *Thermus* sp. In the absence of Si, magnetite was the only mineral formed at both temperatures (75 oC and 55 oC, Fig. S11-a1, a2). In the presence of Si, however, cronstedtite was dominantly precipitated at 55 oC (Fig. S11-b1), while magnetite with minor cronstedtite was formed at 75 oC (Fig. S11-b2), which was also supported by the Mössbauer spectroscope data (Fig. S8-d, e)


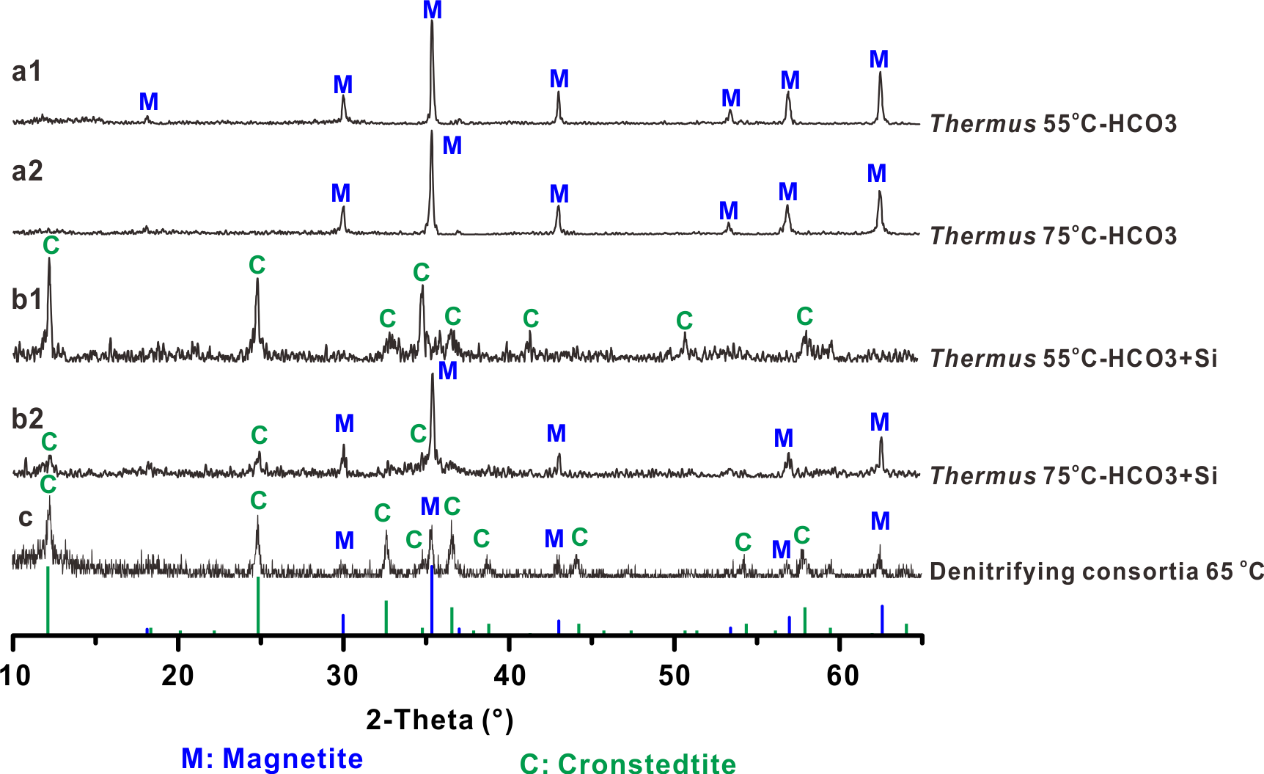


**Fig. S11** Minerals formed by NO3--dependent Fe(II) oxidation by pure *Thermus* sp. and thermophilic denitrifying consortia. Panels **a** and **b** denote the absence and presence of Si, respectively; panel **c** denotes XRD pattern by a thermophilic denitrifying consortia.

SEM observations showed that *Thermus* sp. formed sub-euhedral magnetite with particle size even growing into sub-μm scale in the solution and on the cell surface in the absence of Si (Fig. S12-a1). Nanometer particles of cronstedtite, of typical pseudo-triangle morphology, were widely observed in the presence of Si at 55 oC (Fig. S12-b1, b1’). Besides, greenalite-like sheets were also observed to encrust microbial cell surface (Fig. S12-b1’, b2’), which was detected by Mössbauer spectroscopy (Fig. S8-d, e) but not in XRD, probably due their poor crystallization.


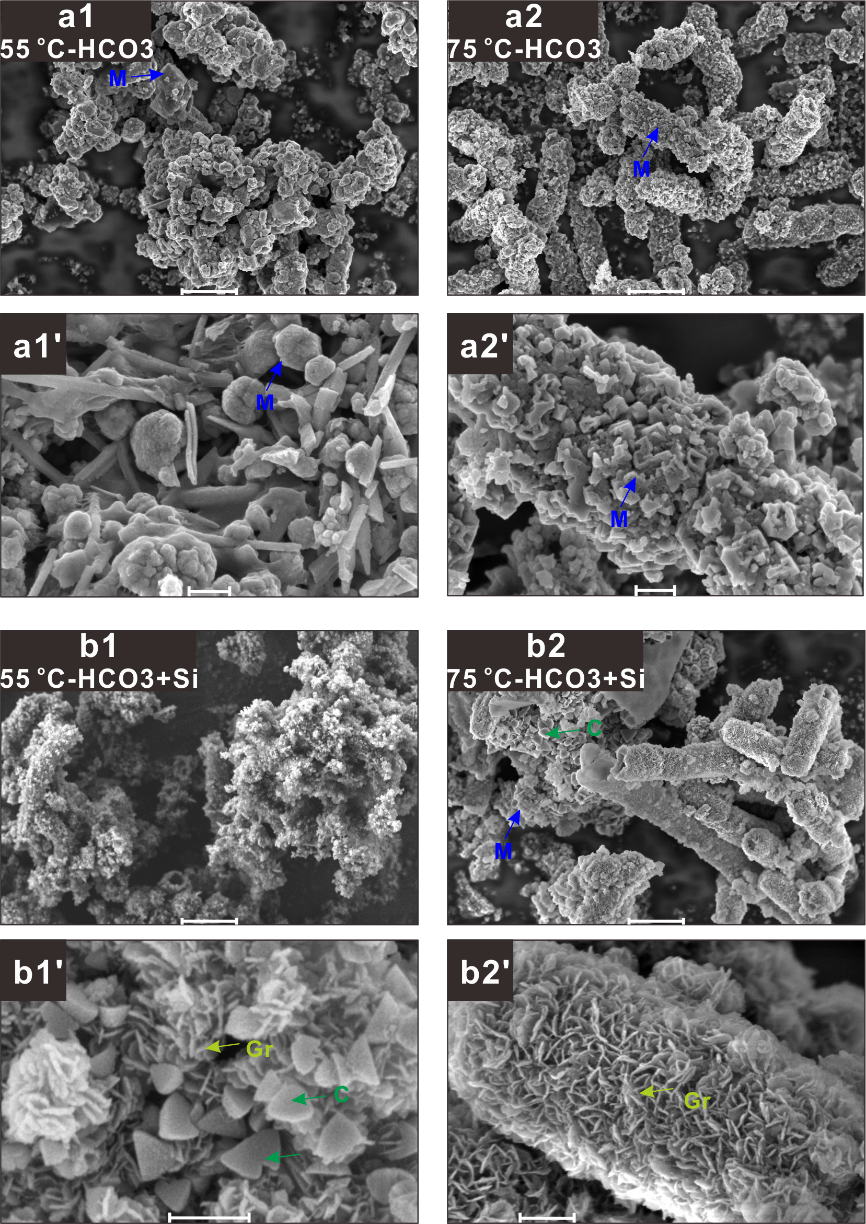


**Fig. S12** SEM observations of Fe minerals formed by microbial NO3--dependent Fe(II) oxidation by *Thermus* sp. without (panel **a**) and with (panel **b**) addition of Si. **a1’-b2’** (scale bar 200 nm)show the amplified shapes of the minerals of **a1-b2** (scale bar 1μm). The arrows and labels are the same as in Fig. S9.

**4. Fe(II) oxidation coupled with NO3- reduction by denitrifying consortia**

The experimental sets **a** (without denitrifying consortia) and **b** (without NO3- as electron acceptor, Table S6) did not show any Fe(II) oxidation or NO3- reduction (Fig. S13). However, in the presence of both NO3- and Fe(II), all the three consortia exhibited strong NO3- reduction (Fig. S13-a2, b2, c2), while the Fe(II) oxidation extent increased with temperature (Fig. S13-a1, b1, c1). Furthermore, in comparison with the stoichiometric conversion of NO3- to NO2- in the canonical denitrification in DG1-1 (Fig. S5-a), less NO2- was accumulated in the presence of Fe(II), suggesting chemical reduction of NO2- by Fe(II) oxidation (Fig. S13-a1). Indeed, Fe(II) was not efficiently oxidized in DG1-3 as NO2- was not produced by denitrification (Fig. S13-c1).


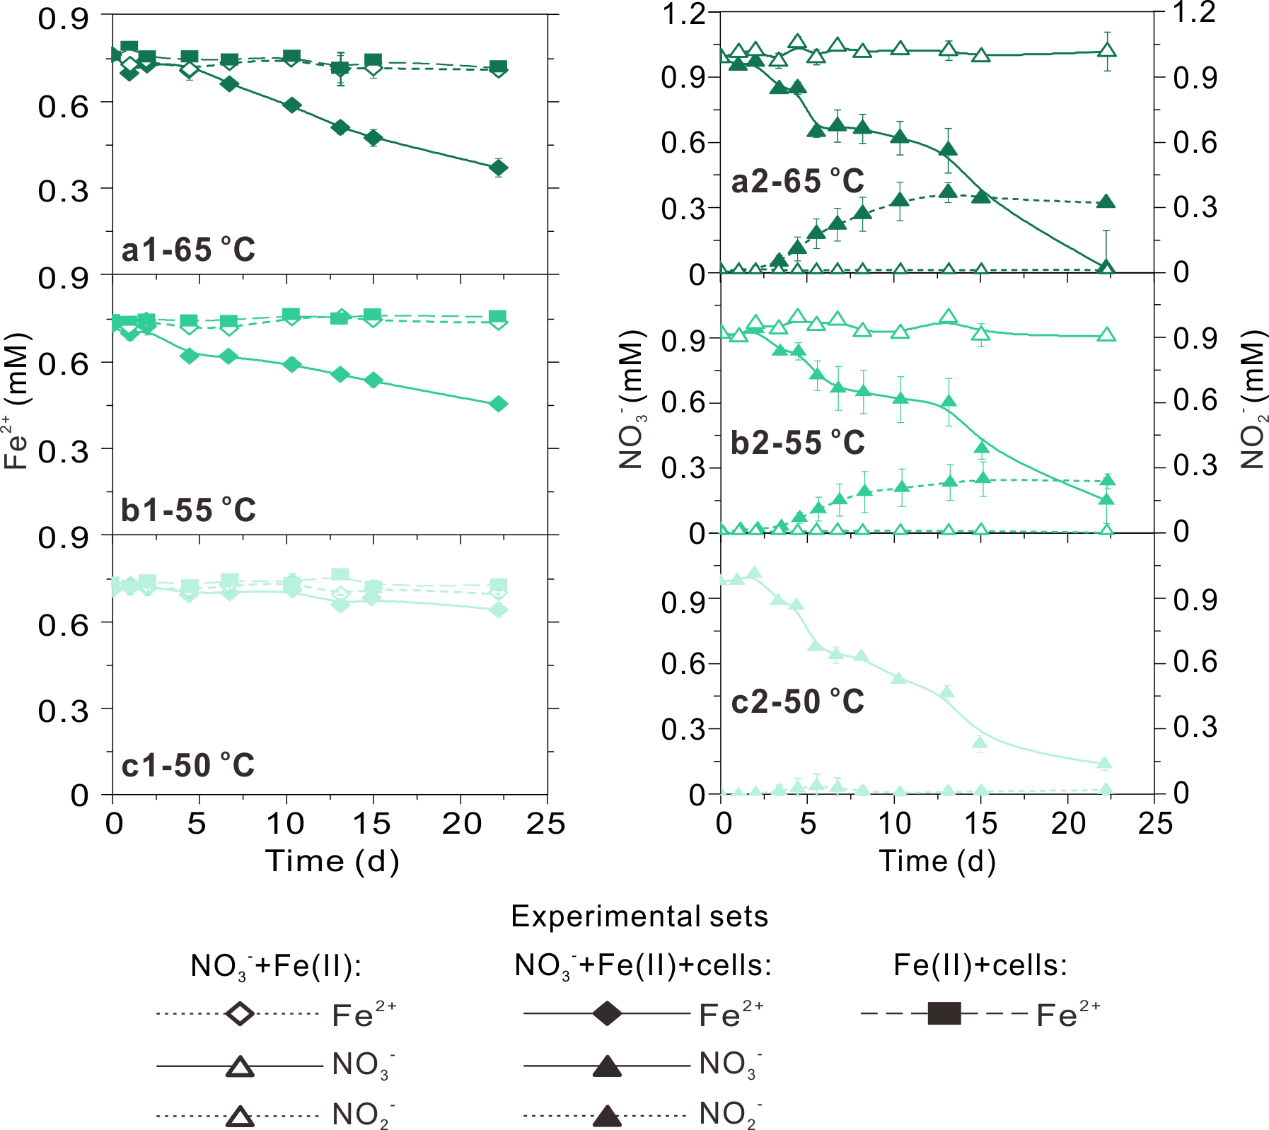


**Fig.** **S13** Microbial Fe(II) oxidation (**a1-c1**) by NO3- reduction (**a2-c2**) by denitrification enrichments: **a,** DG1-1 at 650 oC, **b,** DG1-2 at 55 oC, and **c** DG1-3 at 50 oC

XRD (Fig. S11c) and SEM (Fig. S14) were used to detect the minerals formed by denitrifying consortia in DG1-1 (too little in DG1-2 and no in DG1-3). Cronstedtite and magnetite were the precipitated minerals, which showed better and larger crystalline particles than abiotic and single-bacterium counterparts. For example, the size (μm-size) of cronstedtite particles was larger than that produced by chemodenitrification at 55-75 oC (Fig. S9-c) and by *Thermus* sp. at 55 oC in the presence of Si (Fig. S12-b1).


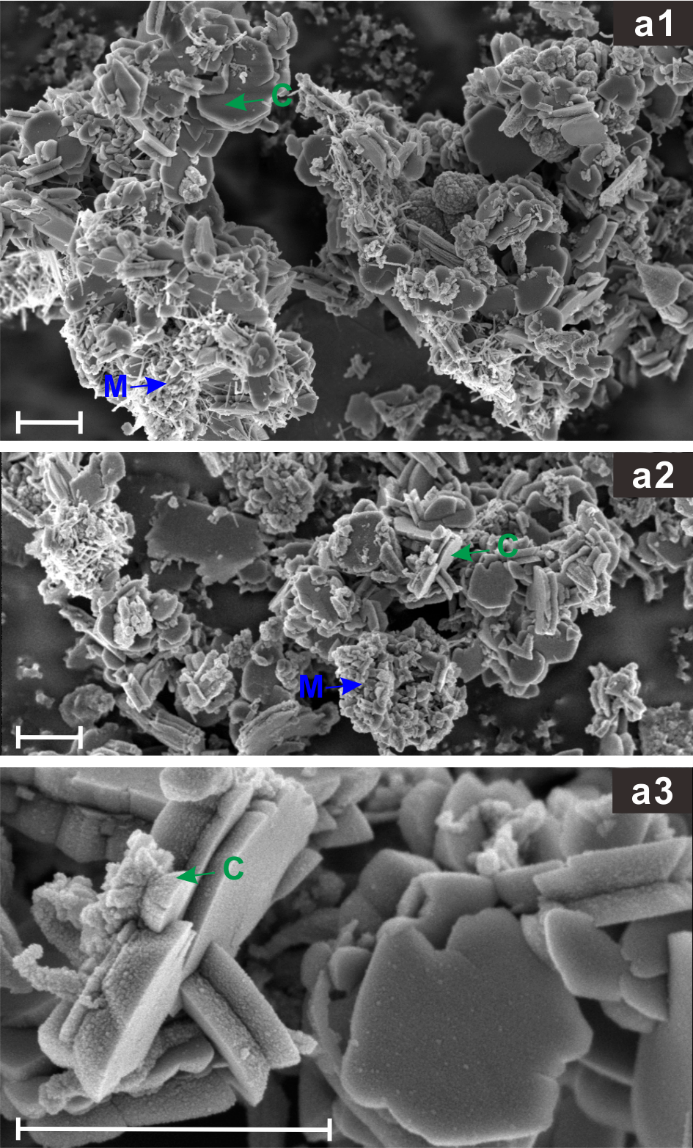


**Fig. S14** SEM observation of Fe minerals formed by NO3—dependent Fe(II) oxidation by denitrifying consortia DG1-1 at 65 oC; The scale bar is 1 μm. The arrows and labels are the same as in Fig. S9

References

1. Wang G, Wan J, Wang E, Zheng D, Li F. Late Cenozoic to recent transtensional deformation across the Southern part of the Gaoligong shear zone between the Indian plate and SE margin of the Tibetan plateau and its tectonic origin. *Tectonophysics* 2008, **460**(1)**:** 1-20.

2. Tapponnier P, Zhiqin X, Roger F, Meyer B, Arnaud N, Wittlinger G*, et al.* Oblique Stepwise Rise and Growth of the Tibet Plateau. *Science* 2001, **294**(5547)**:** 1671-1677.

3. Dong Y, Cao S, Neubauer F, Wang H, Li W, Genser J. Exhumation of the crustal-scale Gaoligong strike-slip shear belt in SE Asia. *Journal of the Geological Society* 2021, **179**(2).

4. Ding L, Kapp P, Cai F, Garzione CN, Xiong Z, Wang H*, et al.* Timing and mechanisms of Tibetan Plateau uplift. *Nature Reviews Earth & Environment* 2022, **3**(10)**:** 652-667.

5. Liao Z, Guo G. Geology of the Tengchong geothermal field and surrounding area, west Yunnan, China. *Geothermics* 1986, **15**(3)**:** 339-345.

6. Zhang G, Liu C-Q, Liu H, Jin Z, Han G, Li L. Geochemistry of the Rehai and Ruidian geothermal waters, Yunnan Province, China. *Geothermics* 2008, **37**(1)**:** 73-83.

7. Amonette JE, Templeton JC. Improvements to the Quantitative Assay of Nonrefractory Minerals for Fe(II) and Total Fe Using 1,10-Phenanthroline. *Clays and Clay Minerals* 1998, **46:** 51-62.

8. Edwards AC, Hooda PS, Cook Y. Determination of Nitrate in Water Containing Dissolved Organic Carbon by Ultraviolet Spectroscopy. *International Journal of Environmental Analytical Chemistry* 2001, **80**(1)**:** 49-59.

9. Schaedler F, Kappler A, Schmidt C. A Revised Iron Extraction Protocol for Environmental Samples Rich in Nitrite and Carbonate. *Geomicrobiology Journal* 2018, **35:** 23 - 30.

10. Zhang Y, Wu G, Jiang H, Yang J, She W, Khan I*, et al.* Abundant and Rare Microbial Biospheres Respond Differently to Environmental and Spatial Factors in Tibetan Hot Springs. *Front Microbiol* 2018, **9:** 2096.

11. Huang J, Han M, Yang J, Kappler A, Jiang H. Salinity Impact on Composition and Activity of Nitrate-Reducing Fe(II)-Oxidizing Microorganisms in Saline Lakes. *Appl Environ Microbiol* 2022, **88**(10)**:** e0013222.

12. Magoč T, Salzberg SL. FLASH: fast length adjustment of short reads to improve genome assemblies. *Bioinformatics* 2011, **27**(21)**:** 2957-2963.

13. Caporaso JG, Kuczynski J, Stombaugh J, Bittinger K, Bushman FD, Costello EK*, et al.* QIIME allows analysis of high-throughput community sequencing data. *Nature Methods* 2010, **7**(5)**:** 335-336.

14. Edgar RC, Haas BJ, Clemente JC, Quince C, Knight R. UCHIME improves sensitivity and speed of chimera detection. *Bioinformatics* 2011, **27**(16)**:** 2194-2200.

15. Edgar RC. UPARSE: highly accurate OTU sequences from microbial amplicon reads. *Nature methods* 2013, **10**(10)**:** 996-998.

16. Wang Q, Garrity GM, Tiedje JM, Cole JR. Naive Bayesian classifier for rapid assignment of rRNA sequences into the new bacterial taxonomy. *Applied and environmental microbiology* 2007, **73**(16)**:** 5261-5267.

17. Rancourt DG, Ping JY. Voigt-based methods for arbitrary-shape static hyperfine parameter distributions in Mössbauer spectroscopy. *Nuclear Instruments and Methods in Physics Research Section B: Beam Interactions with Materials and Atoms* 1991, **58**(1)**:** 85-97.

18. Konhauser KO, Amskold L, Lalonde SV, Posth NR, Kappler A, Anbar A. Decoupling photochemical Fe(II) oxidation from shallow-water BIF deposition. *Earth and Planetary Science Letters* 2007, **258**(1)**:** 87-100.
